# Supplementary material for: The Availability and Consistency of Dengue Surveillance Data Provided Online by the World Health Organization
Source: PubMed Central journal article supplement (PMC4397048; doi:10.1371/journal.pntd.0003511), 2015-04-14
Supplement: pntd.0003511.s001.pdf [file pntd.0003511.s001.pdf]

**Table S1.** Country names used by DengueNet, Regional Offices and corresponding UN ISO names.

| UN ISO 3166 Standard              | Country Name                       |                                                     | Country WHO Region |
|-----------------------------------|------------------------------------|-----------------------------------------------------|--------------------|
|                                   | DengueNet                          | Regional Office                                     |                    |
| BRUNEI DARUSSALAM                 | brunei darussalam                  | brunei                                              | WPRO               |
| FRENCH POLYNESIA                  | french polynesia                   | french polynesia (france)                           | WPRO               |
| GUADELOUPE                        | guadeloupe                         | guadaloupe                                          | PAHO               |
| GUAM                              | guam                               | guam (usa)                                          | WPRO               |
| HONG KONG                         |                                    | hongkong (china)                                    | WPRO               |
|                                   |                                    | hong kong sar (china)                               | WPRO               |
| LAO PEOPLE'S DEMOCRATIC REPUBLIC  | lao people's democratic republic   | lao PDR                                             | WPRO               |
| MACAO                             |                                    | macao sar (china)                                   | WPRO               |
| MICRONESIA, FEDERATED STATES OF   | micronesia (federated states of )  | micronesia, federated states of                     | WPRO               |
| NORTHERN MARIANA ISLANDS          | northern mariana islands           | northern mariana islands, commonwealth of the (usa) | WPRO               |
| PITCAIRN                          |                                    | pitcairn islands                                    | WPRO               |
|                                   |                                    | pitcairn islands (UK)                               | WPRO               |
| SAINT KITTS AND NEVIS             | saint kitts and nevis              | st. kitts & nevis                                   | PAHO               |
| SAINT LUCIA                       | saint lucia                        | st. lucia                                           | PAHO               |
| SAINT VINCENT AND THE GRENADINES  | saint vincent and the grenadines   | st vincent & the grenadines                         | PAHO               |
| TIMOR-LESTE                       | timor-leste                        | timor leste                                         | SEARO              |
| TRINIDAD AND TOBAGO               | trinidad and tobago                | trinidad & tobago                                   | PAHO               |
| TURKS AND CAICOS ISLANDS          | turks and caicos islands           | turks & caicos islands                              | PAHO               |
| VENEZUELA, BOLIVARIAN REPUBLIC OF | venezuela (bolivarian republic of) | venezuela                                           | PAHO               |
|                                   |                                    |                                                     |                    |
| WALLIS AND FUTUNA                 | wallis and futuna islands          | wallis and futuna                                   | WPRO               |
