# Supplementary material for: The Availability and Consistency of Dengue Surveillance Data Provided Online by the World Health Organization
Source: PubMed Central journal article supplement (PMC4397048; doi:10.1371/journal.pntd.0003511), 2015-04-14

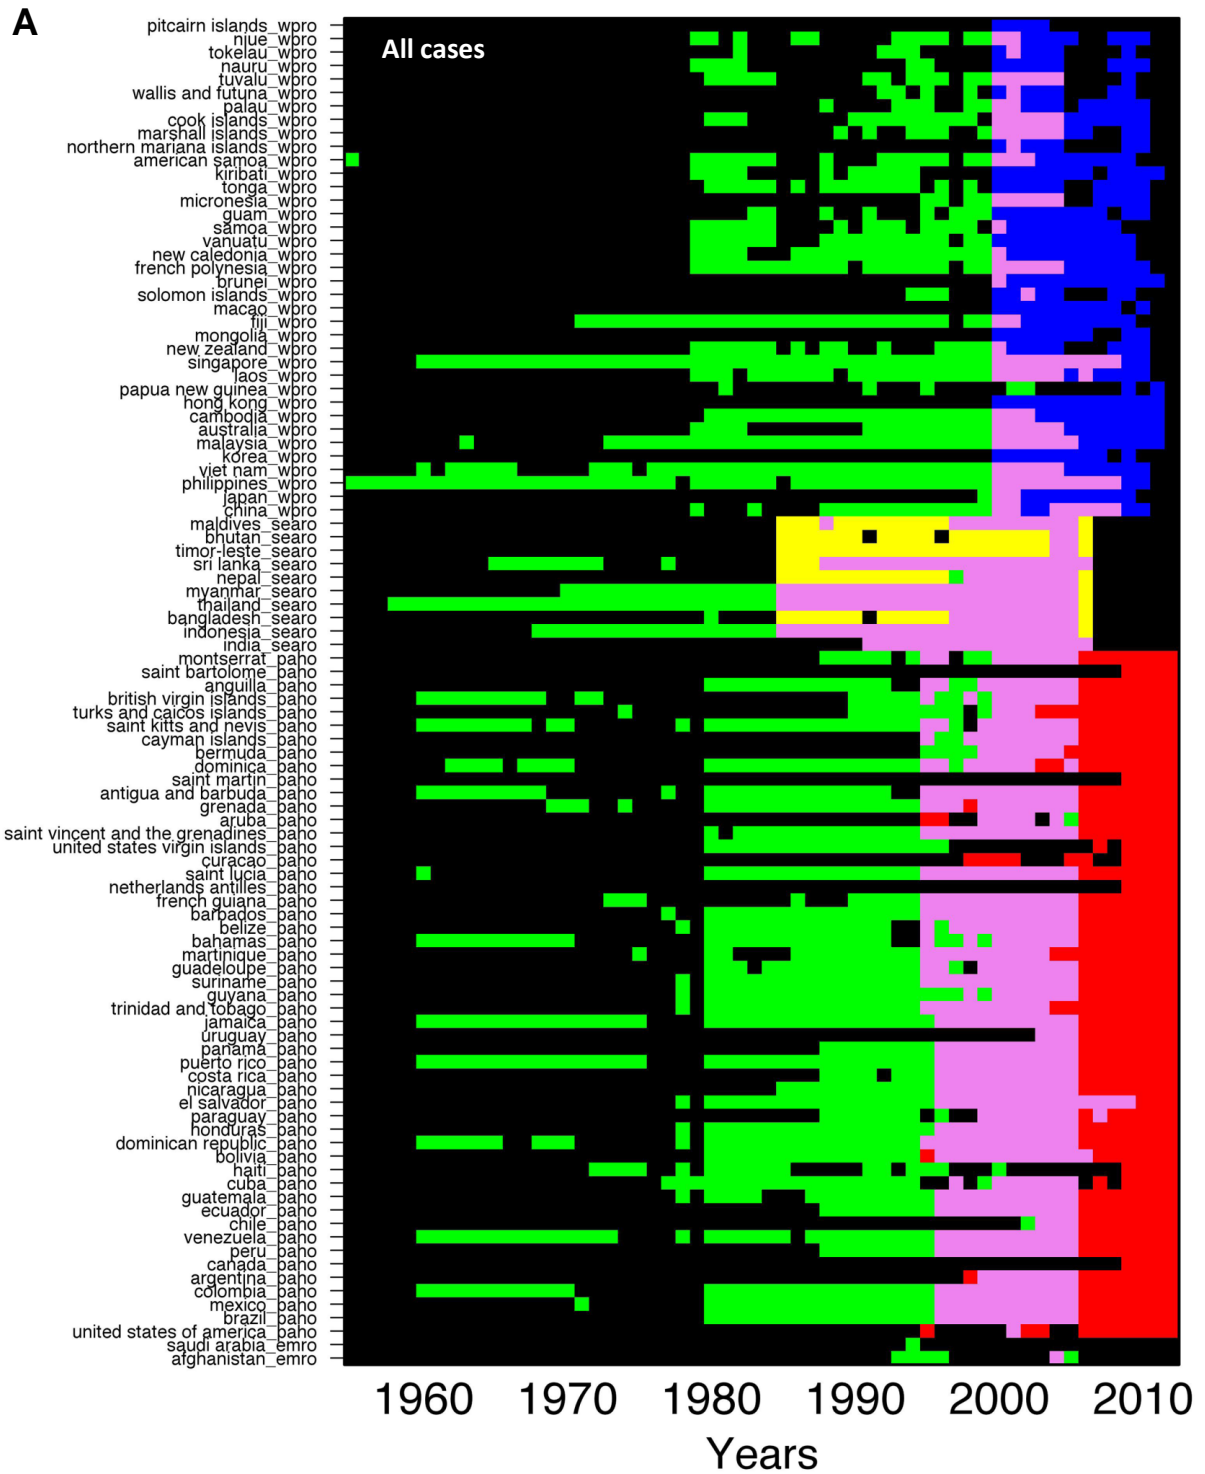

**Figure S1. Data availability from WHO DengueNet and Regional Offices per country: 1955-2012.** (A) Data for “all cases” (dengue fever and dengue hemorrhagic fever, DHF), (B) data for “all deaths”, and (C) data for DHF cases. Data availability from DengueNet is indicated in green, from WPRO in blue, from SEARO in yellow, and from PAHO in red. Data points that are available from both DengueNet and a regional office are shown in pink.

B

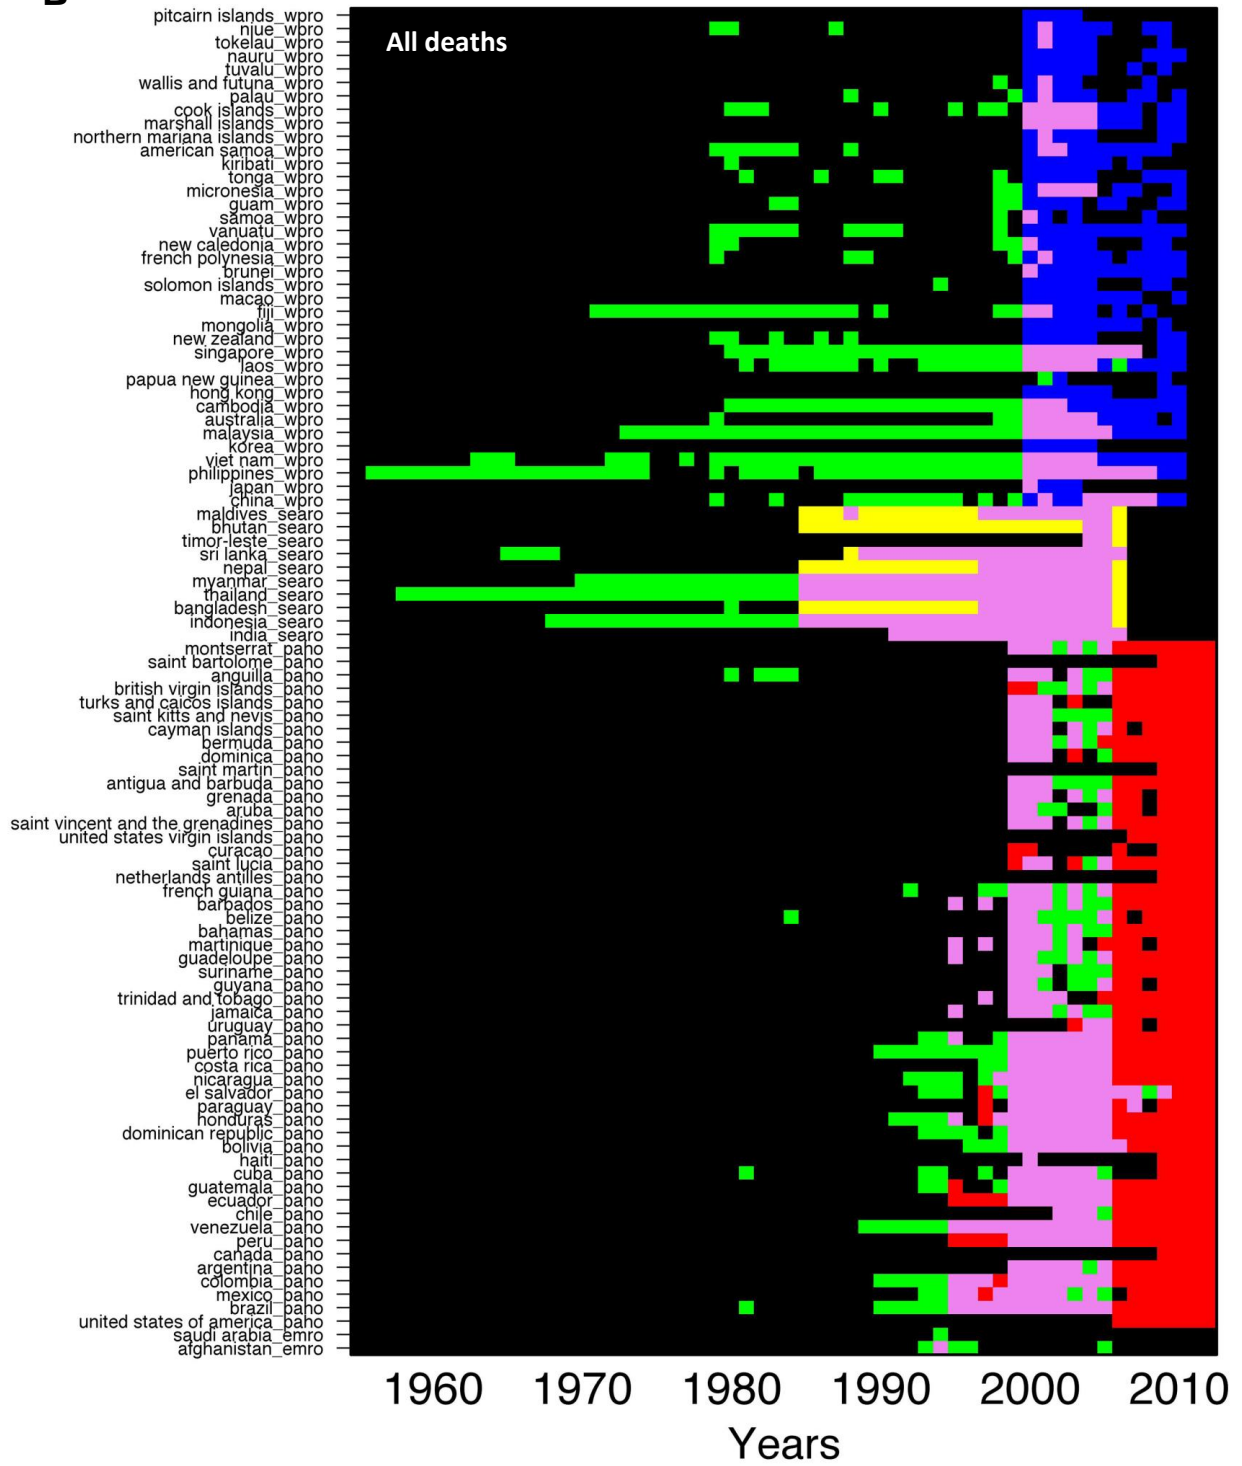

C

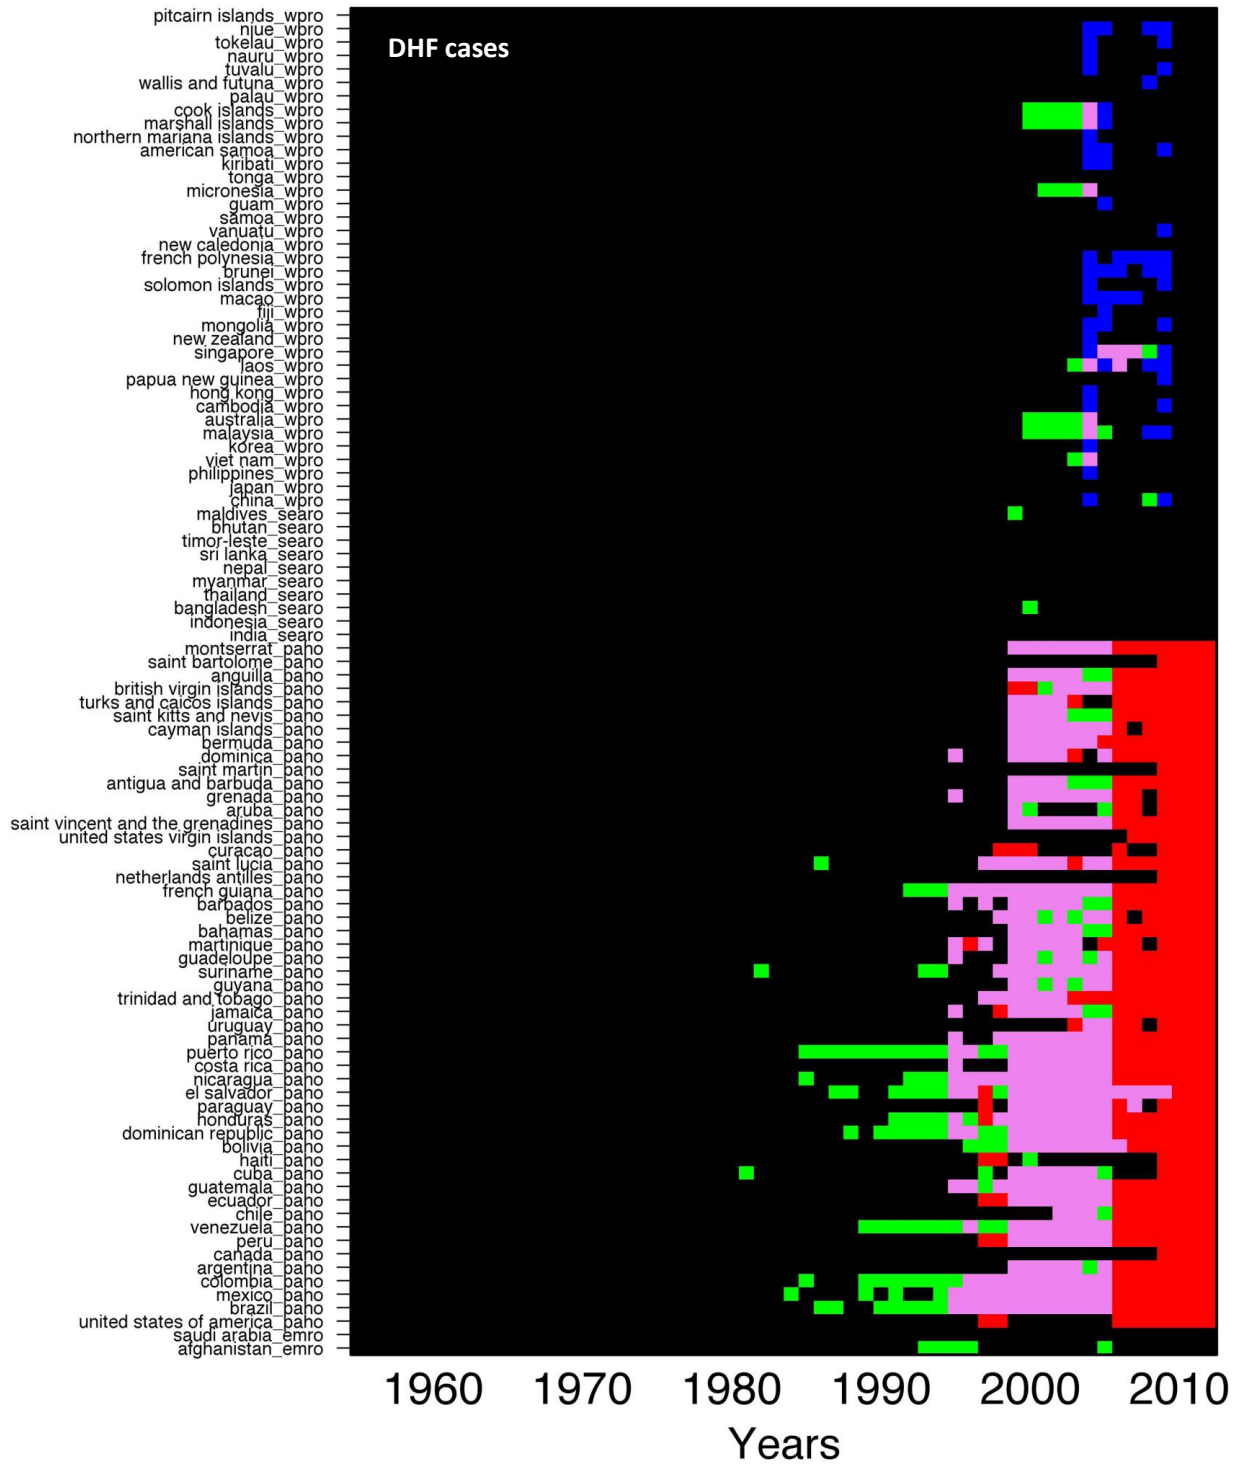

Supplement: pntd.0003511.s002.pdf [file pntd.0003511.s002.pdf]
