# Supplementary material for: The Availability and Consistency of Dengue Surveillance Data Provided Online by the World Health Organization
Source: PubMed Central journal article supplement (PMC4397048; doi:10.1371/journal.pntd.0003511), 2015-04-14
Supplement: pntd.0003511.s003.pdf [file pntd.0003511.s003.pdf]

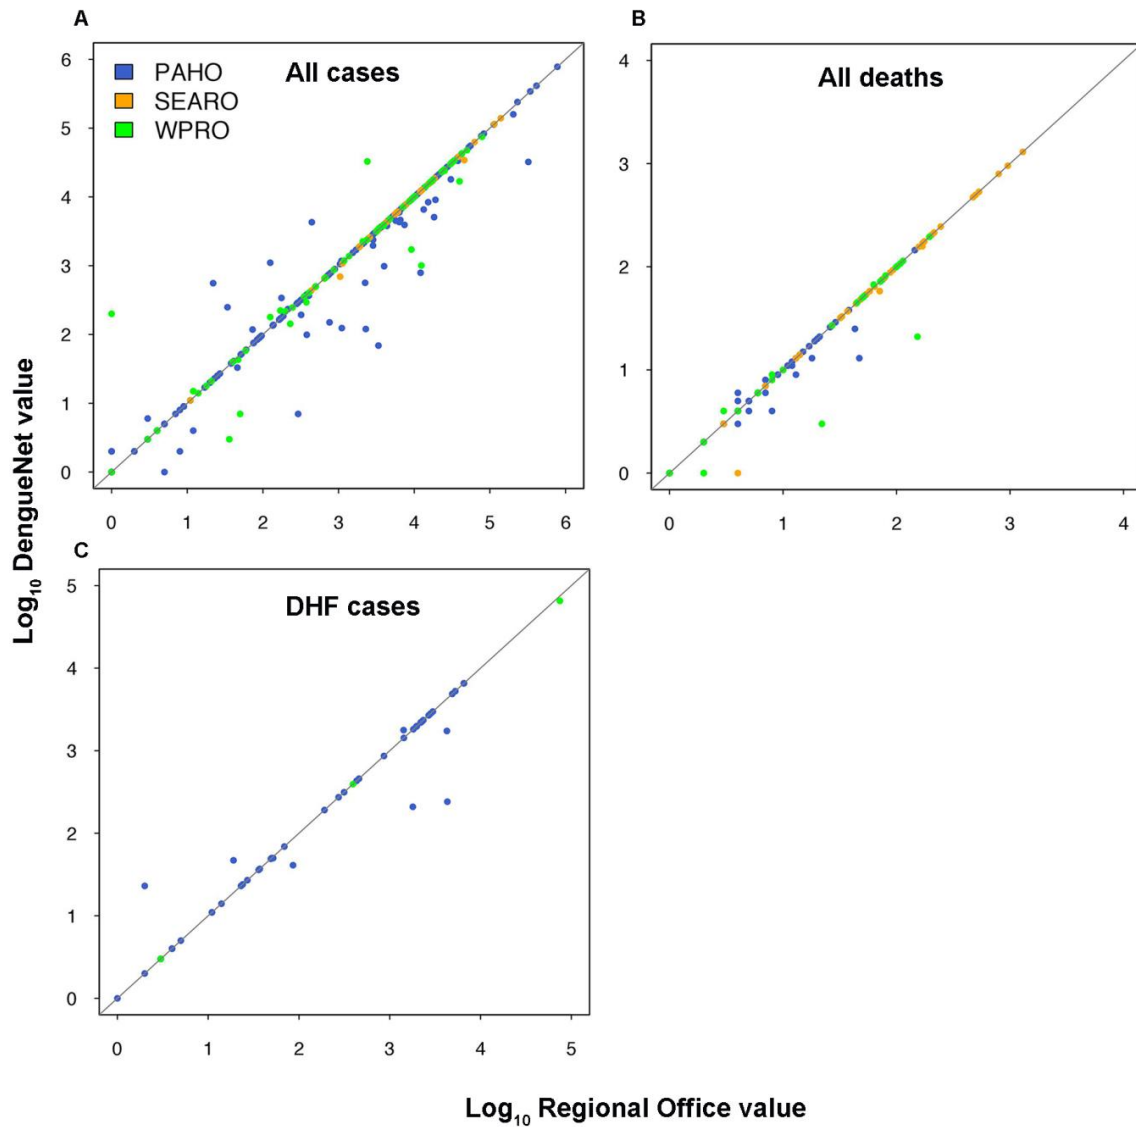

**Figure S2. Consistency of data from DengueNet and WHO Regional Offices.** Data were available from both sources for years between 2000 and 2005 for (A) “all cases”, (B) “all deaths”, and (C) DHF cases.
