# Supplementary material for: The Availability and Consistency of Dengue Surveillance Data Provided Online by the World Health Organization
Source: PubMed Central journal article supplement (PMC4397048; doi:10.1371/journal.pntd.0003511), 2015-04-14
Supplement: pntd.0003511.s004.pdf [file pntd.0003511.s004.pdf]

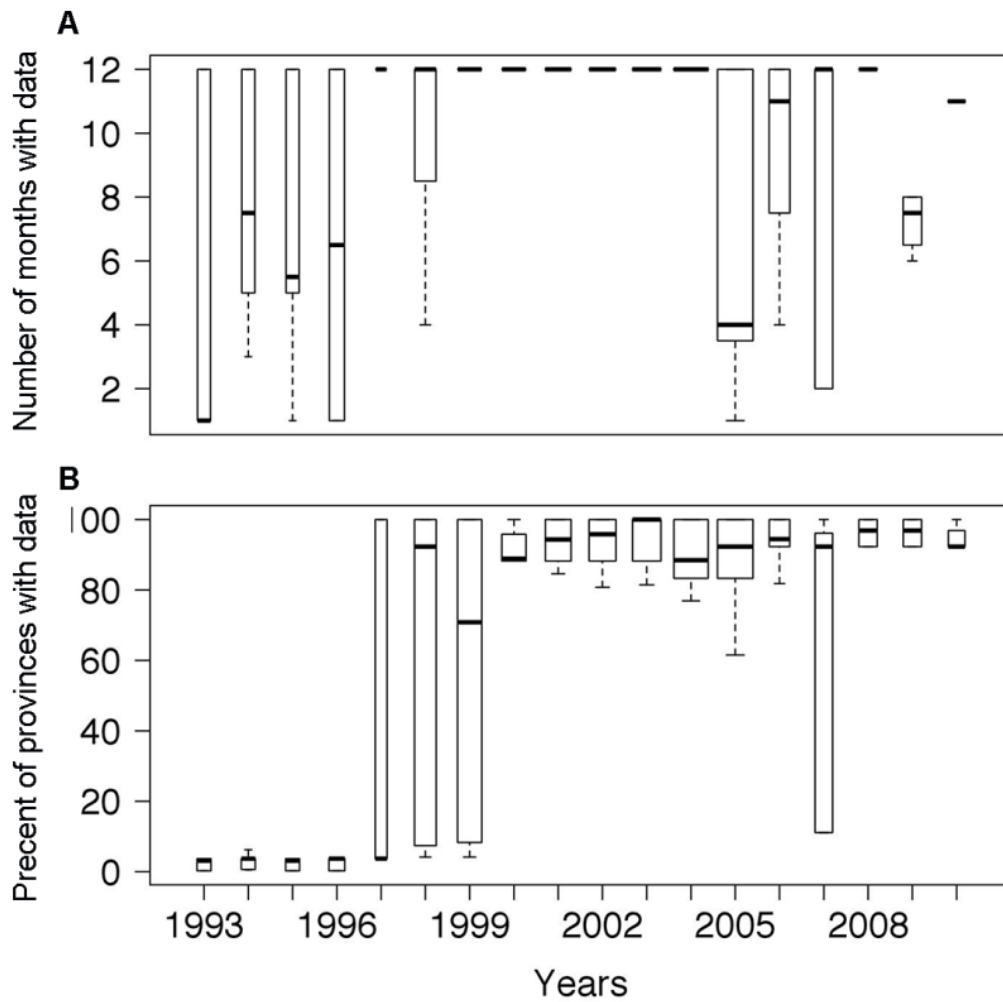

**Figure S3. Completeness of DengueNet data on “all cases” at provincial/monthly resolution across countries by year.** Per year, the distribution across countries is shown of the number of calendar months (A) and the percent of all provinces (B) with data available for “all cases”.
